# Supplementary material for: Artificial photosynthesis of H2O2 over a self-assembled two-dimensional g-C3N4 film
Source: Royal Society of Chemistry journal article supplement (doi:10.1039/d4ta09180a), 2025-01-01
Supplement: d4ta09180a1.pdf [file d4ta09180a1.pdf]

## Supplementary Material

### Artificial photosynthesis of H<sub>2</sub>O<sub>2</sub> over self-assembly two-dimensional g-C<sub>3</sub>N<sub>4</sub> film

Aoli Liu <sup>a</sup>, Jianwei Zhou<sup>\*b,a</sup>

<sup>a</sup>*School of Chemistry and Chemical Engineering, Henan Normal University,* <sup>b</sup>*School of Chemistry and Material Engineering, Xinxiang University, Xinxiang 453003, PR China*

---

\*Corresponding author: School of Chemistry and Material Engineering, Xinxiang University, Xinxiang 453003, Henan, China. E-mail: [jwchow@163.com](mailto:jwchow@163.com); Fax:+86-373-3682712; Tel: +86-373-3682712.

## Characterizations

Morphological analysis was conducted using field emission scanning electron microscopy (FESEM, FEI, QUANTA FEG 250). X-ray diffraction patterns were obtained using a Cu-K $\alpha$  radiation XRD diffractometer ( $\lambda = 0.154056$  nm, Bruker, D8 Advance). Atomic force microscopy image analysis was performed with an AFM microscope (Bruker, Dimension ICON). UV-Vis diffuse reflectance spectra were measured at room temperature with BaSO<sub>4</sub> as the reference. X-ray photoelectron spectroscopy was conducted with using an Al K $\alpha$  XPS electron spectrometer ( $h\nu = 1486.6$  eV, Thermo Fisher, Escalab xi+). Photoluminescence spectra analysis was conducted on a Hitachi F-4600 fluorescence spectrometer with a 350 nm excitation wavelength and a 150 W Xe lamp as the light source. The transient photocurrent response, Mott-Schottky curve and Electrochemical Impedance Spectroscopy were taken using an electrochemical system (CHI-660E, China) with a standard three-electrode system and Ag/AgCl electrode as the reference electrode in a 0.1 M Na<sub>2</sub>SO<sub>4</sub> electrolyte solution and a 300 W Xe lamp as the light source. The EPR measurements were conducted on the Bruker EMXplus-6/1 model spectrometer in Germany. The time-resolved fluorescence decay spectra were recorded by the Edinburgh FLS1000 spectrometer, with a step size of 1nm and an integral time of 0.1s. The O<sub>2</sub>-TPD measurements were carried out on the Micromeritics AutoChem 2950 HP in the United States. Electrochemical performance tests were performed at CHI 660e MSR with a rotating disk electrode unit (PINE) AFMSRCE.

Electrochemical measurement of oxygen reduction reaction. The number of transferred electrons ( $n$ ) and H<sub>2</sub>O<sub>2</sub> selectivity of the sample in the ORR reaction were determined through the rotating ring-disk electrode (RRDE). A three-electrode system was employed for electrochemical measurement, in which RRDE was served as a working electrode, a Hg/HgO as the reference electrode, and a Pt/C as the counter electrode. A 0.1M saturated KOH solution was utilized as the electrolyte. The RRDE speed was set to 1600 rpm and the potential range was set to 0 ~ 1.0V vs. RHE.  $N$  is the collection efficiency ( $N=0.35$ ).

DMPO spin-trapping EPR measurement. With 5, 5-dimethyl-1-pyrroline N-oxide (DMPO) serving as a spin trap, the reactive  $\cdot\text{O}_2^-$  species were detected under light irradiation. The  $30\ \mu\text{L}$  catalyst ( $1\text{g mL}^{-1}$ ) was dispersed in a solvent and mixed with certain amount of DMPO solution. Subsequently, a certain amount of the mixed liquid was absorbed into a capillary tube under light irradiation (5 min) for the detection of photogenerated  $\cdot\text{O}_2^-$  species.

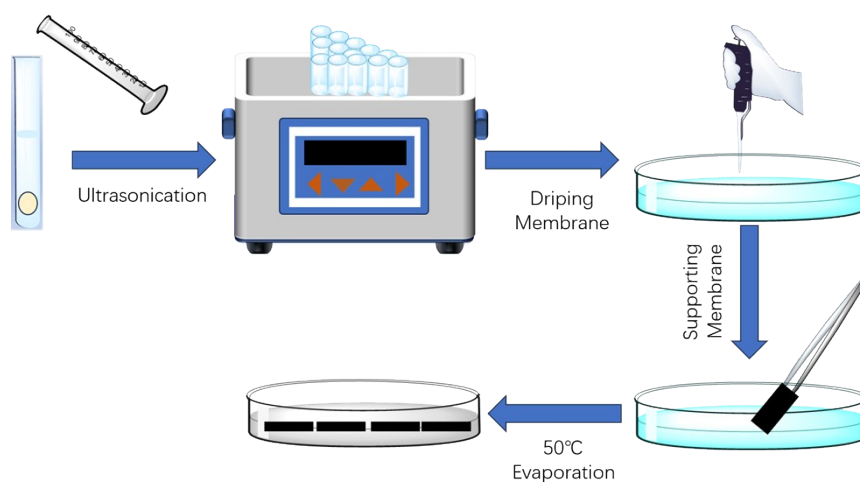

**Figure S1** Schematic illustration for the preparation process of  $\text{g-C}_3\text{N}_4$  film

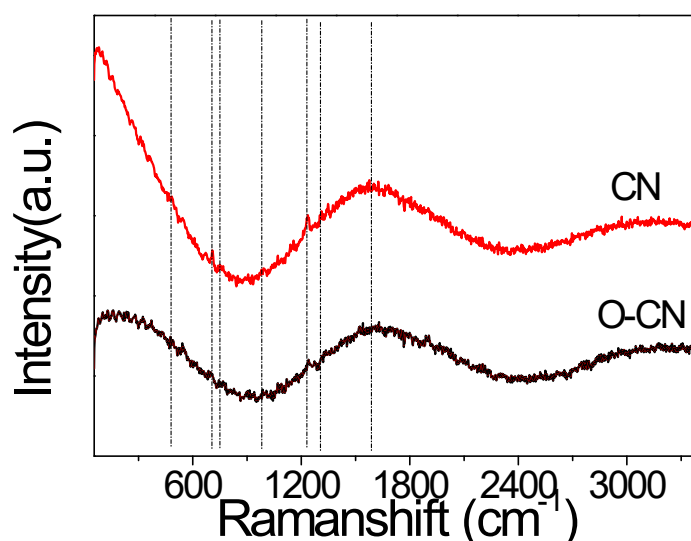

**Figure S2** Raman spectra of  $\text{g-C}_3\text{N}_4$  samples
